# Supplementary material for: Wnt signaling in liver regeneration, disease, and cancer
Source: PubMed Central journal article supplement — Clin Mol Hepatol. 2022 Jul 4;29(1):33–50. doi: 10.3350/cmh.2022.0058 (PMC9845677; doi:10.3350/cmh.2022.0058), 2022-07-04
Supplement: cmh-2022-0058-suppl.pdf [file cmh-2022-0058-suppl.pdf]

**Supplementary Table 1.** Additional clinical trials related with peg-IFN, hydroxychloroquine and CAR-GPC3 T cell in liver cancers

| Agent              | Target                | Phase      | Trial identifier | Type                      |
|--------------------|-----------------------|------------|------------------|---------------------------|
| Peg-IFN            | TCF/ $\beta$ -catenin | Phase II   | NCT00610389      | Protein                   |
| Peg-IFN            | TCF/ $\beta$ -catenin | Phase III  | NCT01821963      | Protein                   |
| Hydroxychloroquine | v-ATPase              | Phase II   | NCT03037437      | Small molecule inhibitors |
| Hydroxychloroquine | v-ATPase              | Phase I/II | NCT02013778      | Small molecule inhibitors |
| Hydroxychloroquine | v-ATPase              | Phase I    | NCT04873895      | Small molecule inhibitors |
| CAR-GPC3 T cell    | GPC3                  | Phase I    | NCT02932956      | Cells                     |
| CAR-GPC3 T cell    | GPC3                  | Phase I    | NCT04093648      | Cells                     |
| CAR-GPC3 T cell    | GPC3                  | Phase I    | NCT05003895      | Cells                     |
| CAR-GPC3 T cell    | GPC3                  | Phase I/II | NCT04864054      | Cells                     |
| CAR-GPC3 T cell    | GPC3                  | Phase I    | NCT04951141      | Cells                     |
| CAR-GPC3 T cell    | GPC3                  | Phase I    | NCT04842812      | Cells                     |
| CAR-GPC3 T cell    | GPC3                  | Phase I    | NCT04377932      | Cells                     |
| CAR-GPC3 T cell    | GPC3                  | Phase I    | NCT04715191      | Cells                     |
| CAR-GPC3 T cell    | GPC3                  | Phase I    | NCT05103631      | Cells                     |
| CAR-GPC3 T cell    | GPC3                  | Phase I/II | NCT02715362      | Cells                     |
| CAR-GPC3 T cell    | GPC3                  | NA         | NCT03146234      | Cells                     |
| CAR-GPC3 T cell    | GPC3                  | Phase I    | NCT03198546      | Cells                     |
| CAR-GPC3 T cell    | GPC3                  | Phase I/II | NCT03130712      | Cells                     |
| CAR-GPC3 T cell    | GPC3                  | NA         | NCT05047510      | Cells                     |
| CAR-GPC3 T cell    | GPC3                  | Phase I    | NCT04506983      | Cells                     |
| CAR-GPC3 T cell    | GPC3                  | Phase I/II | NCT05120271      | Cells                     |
| CAR-GPC3 T cell    | GPC3                  | Phase I    | NCT03884751      | Cells                     |
| CAR-GPC3 T cell    | GPC3                  | Phase I    | NCT02395250      | Cells                     |
| CAR-GPC3 T cell    | GPC3                  | Phase I    | NCT03980288      | Cells                     |
| CAR-GPC3 T cell    | GPC3                  | Phase I/II | NCT02723942      | Cells                     |
| CAR-GPC3 T cell    | GPC3                  | Phase I/II | NCT03084380      | Cells                     |
| CAR-GPC3 T cell    | GPC3                  | Phase I    | NCT02905188      | Cells                     |
| CAR-GPC3 T cell    | GPC3                  | Phase I    | NCT04121273      | Cells                     |
| CAR-GPC3 T cell    | GPC3                  | Phase I    | NCT05070156      | Cells                     |
| CAR-GPC3 T cell    | GPC3                  | NA         | NCT03302403      | Cells                     |
| CAR-GPC3 T cell    | GPC3                  | Phase I    | NCT04756648      | Cells                     |
| CAR-GPC3 T cell    | GPC3                  | Phase I    | NCT04973098      | Cells                     |
| CAR-GPC3 T cell    | GPC3                  | Phase I/II | NCT02959151      | Cells                     |
| CAR-GPC3 T cell    | GPC3                  | Phase I    | NCT05155189      | Cells                     |

peg-IFN, pegylated-Interferon- $\alpha$ 2a; CRA-GPC3, glypican-3; TCF, T-cell factor; v-ATPase, vacuolar-type ATPase; GPC3, glypican-3; NA, not available.
